# Supplementary material for: Phosphonodiamidate prodrugs of phosphoantigens (ProPAgens) exhibit potent Vγ9/Vδ2 T cell activation and eradication of cancer cells
Source: Royal Society of Chemistry journal article supplement (doi:10.1039/d4md00208c), 2024-01-01
Supplement: d4md00208c1.pdf [file d4md00208c1.pdf]

# Phosphonodiamidate Prodrugs of Phosphoantigens (ProPAgens) Exhibit Potent V $\gamma$ 9/V $\delta$ 2 T Cell Activation and Eradication of Cancer Cells

Qin Xu,<sup>1,‡</sup> Maria Sharif,<sup>2,3,‡</sup> Edward James,<sup>1</sup> Jack O. Dismorr,<sup>4</sup> James H. R. Tucker,<sup>4</sup> Benjamin E. Willcox<sup>2,3,\*</sup>, and Youcef Mehellou<sup>1,5\*</sup>

<sup>1</sup>*School of Pharmacy and Pharmaceutical Sciences, Cardiff University, Cardiff CF10 3NB, U.K.*

<sup>2</sup>*Institute of Immunology and Immunotherapy, University of Birmingham, Birmingham B15 2TT, U.K.*

<sup>3</sup>*Cancer Immunology and Immunotherapy Centre, University of Birmingham, Birmingham B15 2TT, U.K.*

<sup>4</sup>*School of Chemistry, University of Birmingham, Birmingham B15 2TT, U.K.*

<sup>5</sup>*Medicines Discovery Institute, Cardiff University, Cardiff CF10 3AT, U.K.*

\*Corresponding Authors: B.E.W: [b.willcox@bham.ac.uk](mailto:b.willcox@bham.ac.uk), YM; [MehellouY1@cardiff.ac.uk](mailto:MehellouY1@cardiff.ac.uk),

## Content

- Figure S1: HPLC chromatograms of final ProPAgens.....S2-S9
- Figure S2: Activation of V $\gamma$ 9/V $\delta$ 2 T cells by compounds 9d and 14d .....S10
- Figure S3: HPLC chromatograms of ProPAgens 9d and 14d after the assays.....S11-S14
- Figure S4: Background activation of V $\gamma$ 9/V $\delta$ 2 T cells with DMSO and activation of CD8+ T cells with compounds 9d and 14d.....S15

Figure S1. HPLC chromatograms of final ProPAgens.

# Analysis Report

## <Sample Information>

Sample Name : DAFN-Me-1  
Sample ID : Me01  
Data Filename : XQ-DAFN-Me-1.lcd  
Method Filename : method diamidate.lcm  
Batch Filename : Batch Meisotbu01 310119.lcb  
Vial # : 1-1  
Injection Volume : 10 uL  
Date Acquired : 31/01/2019 14:55:21  
Date Processed : 31/01/2019 15:07:21

**ProPAgen 9a**

Sample Type : Unknown  
Acquired by : System Administrator  
Processed by : System Administrator

## <Chromatogram>

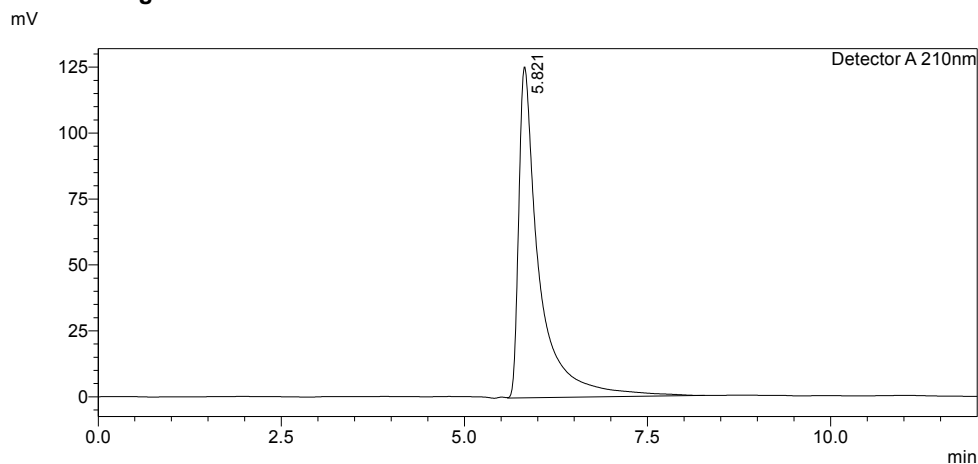

## <Peak Table>

| Detector A 210nm |           |         |        |         |
|------------------|-----------|---------|--------|---------|
| Peak#            | Ret. Time | Area    | Height | Area%   |
| 1                | 5.821     | 2444504 | 125392 | 100.000 |
| Total            |           | 2444504 | 125392 | 100.000 |

# Analysis Report

**<Sample Information>**

Sample Name : DAFN-Iso-1  
 Sample ID : Iso01  
 Data Filename : XQ-DAFN-Iso-1.lcd  
 Method Filename : method diamidate.lcm  
 Batch Filename : Batch Meisotbu01 310119.lcb  
 Vial # : 1-2  
 Injection Volume : 10 uL  
 Date Acquired : 31/01/2019 15:07:40  
 Date Processed : 31/01/2019 15:19:41

**ProPagen 9b**

Sample Type : Unknown  
 Acquired by : System Administrator  
 Processed by : System Administrator

**<Chromatogram>**

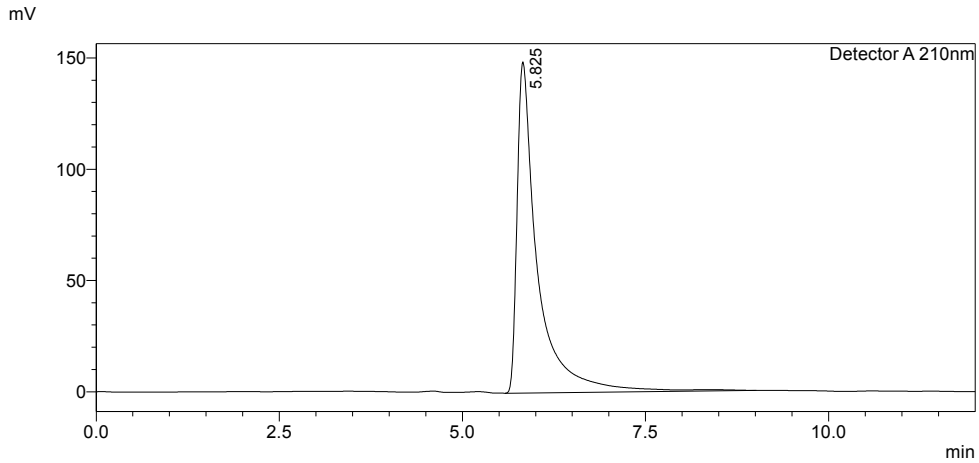

**<Peak Table>**

| Detector A 210nm |           |         |        |         |
|------------------|-----------|---------|--------|---------|
| Peak#            | Ret. Time | Area    | Height | Area%   |
| 1                | 5.825     | 2891023 | 148697 | 100.000 |
| Total            |           | 2891023 | 148697 | 100.000 |

# Analysis Report

## <Sample Information>

Sample Name : tBu-004  
 Sample ID : tBu004  
 Data Filename : XQ-DAFN-tBU-004.lcd  
 Method Filename : method diamidate.lcm  
 Batch Filename : batch05 diamidate 040219.lcb  
 Vial # : 1-1  
 Injection Volume : 5 uL  
 Date Acquired : 04/02/2019 15:35:14  
 Date Processed : 04/02/2019 15:47:14

**ProPagen 9c**

Sample Type : Unknown  
 Acquired by : System Administrator  
 Processed by : System Administrator

## <Chromatogram>

mV

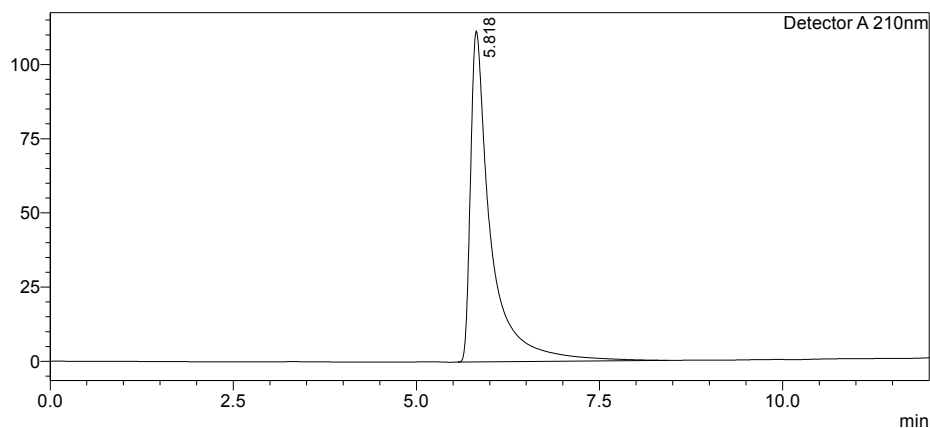

## <Peak Table>

Detector A 210nm

| Peak# | Ret. Time | Area    | Height | Area%   |
|-------|-----------|---------|--------|---------|
| 1     | 5.818     | 2145865 | 111485 | 100.000 |
| Total |           | 2145865 | 111485 | 100.000 |

# Analysis Report

## <Sample Information>

Sample Name : DAFN-BN-001  
 Sample ID : BN-001  
 Data Filename : XQ-DAFN-Bn-2.lcd  
 Method Filename : method diamidate.lcm  
 Batch Filename : Batch 0.7mlmin 310119.lcb  
 Vial # : 1-1  
 Injection Volume : 10 uL  
 Date Acquired : 31/01/2019 14:16:14  
 Date Processed : 31/01/2019 14:28:15

**ProPagen 9d**

Sample Type : Unknown  
 Acquired by : System Administrator  
 Processed by : System Administrator

## <Chromatogram>

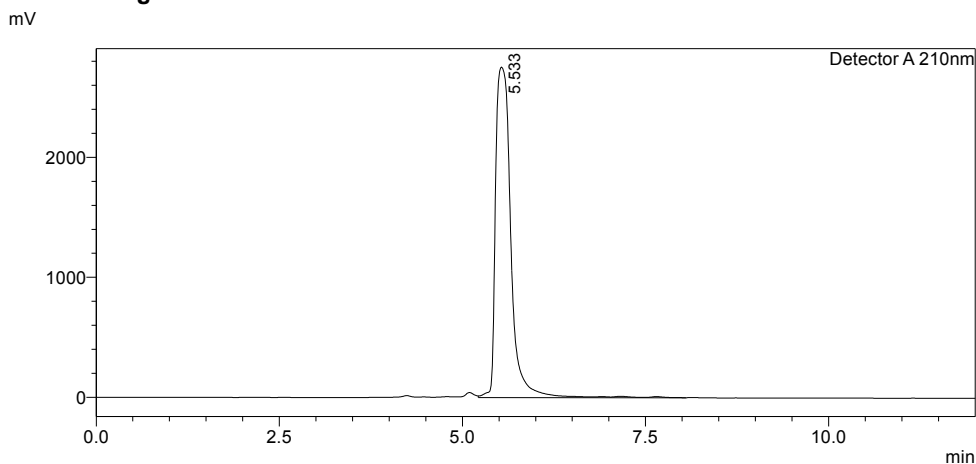

## <Peak Table>

| Detector A 210nm |           |          |         |         |
|------------------|-----------|----------|---------|---------|
| Peak#            | Ret. Time | Area     | Height  | Area%   |
| 1                | 5.533     | 40083588 | 2753823 | 100.000 |
| Total            |           | 40083588 | 2753823 | 100.000 |

# Analysis Report

## <Sample Information>

**ProPagen 14a**

Sample Name : NDFN-Me-001  
 Sample ID : NDFN-Me-001  
 Data Filename : XQ-NDFN-Me-002.lcd  
 Method Filename : method diamidate.lcm  
 Batch Filename : Batch02 diamidate 110219.lcb  
 Vial # : 1-1  
 Injection Volume : 5 uL  
 Date Acquired : 11/02/2019 14:48:12  
 Date Processed : 11/02/2019 15:00:14

Sample Type : Unknown  
 Acquired by : System Administrator  
 Processed by : System Administrator

## <Chromatogram>

mV

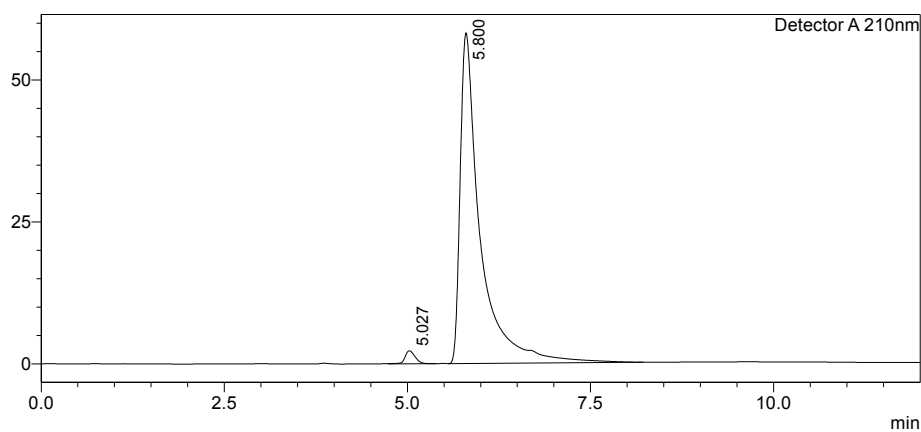

## <Peak Table>

| Detector A 210nm |           |         |        |         |
|------------------|-----------|---------|--------|---------|
| Peak#            | Ret. Time | Area    | Height | Area%   |
| 1                | 5.027     | 22379   | 2294   | 1.976   |
| 2                | 5.800     | 1110111 | 58194  | 98.024  |
| Total            |           | 1132490 | 60488  | 100.000 |

# Analysis Report

**<Sample Information>**

**ProPagen 14b**

Sample Name : NDFN-Iso001  
 Sample ID : Iso001  
 Data Filename : XQ-NDFN-ISO-01.lcd  
 Method Filename : method diamidate.lcm  
 Batch Filename : Batch01 diamidate 040219.lcb  
 Vial # : 1-2  
 Injection Volume : 10 uL  
 Date Acquired : 04/02/2019 14:37:18  
 Date Processed : 04/02/2019 14:49:19

Sample Type : Unknown  
 Acquired by : System Administrator  
 Processed by : System Administrator

**<Chromatogram>**

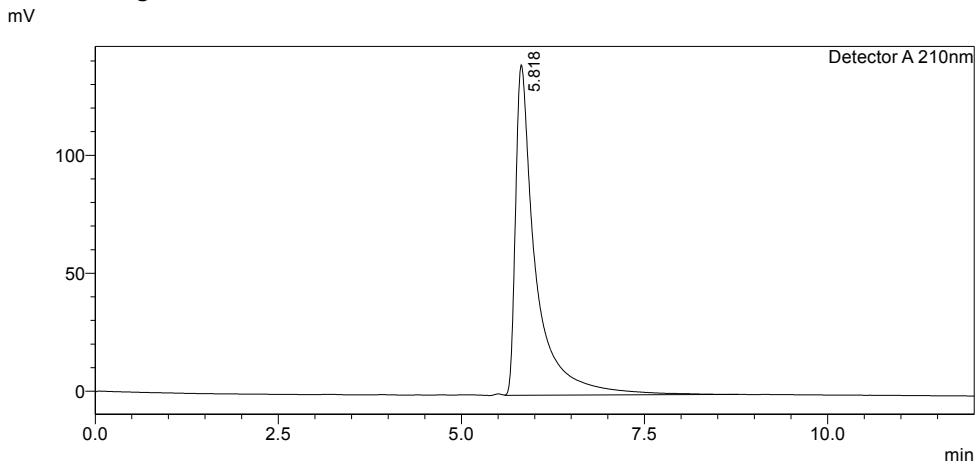

**<Peak Table>**

| Detector A 210nm |           |         |        |         |
|------------------|-----------|---------|--------|---------|
| Peak#            | Ret. Time | Area    | Height | Area%   |
| 1                | 5.818     | 2693580 | 140021 | 100.000 |
| Total            |           | 2693580 | 140021 | 100.000 |

# Analysis Report

## <Sample Information>

Sample Name : NDFN-tBu-001  
 Sample ID : NDFN-tBu-001  
 Data Filename : XQ-NDFN-tBu-003.lcd  
 Method Filename : method diamidate.lcm  
 Batch Filename : batch4 diamidate 110219.lcb  
 Vial # : 1-1  
 Injection Volume : 10 uL  
 Date Acquired : 11/02/2019 15:23:12  
 Date Processed : 11/02/2019 15:40:57

**ProPagen 14c**

Sample Type : Unknown  
 Acquired by : System Administrator  
 Processed by : System Administrator

## <Chromatogram>

mV

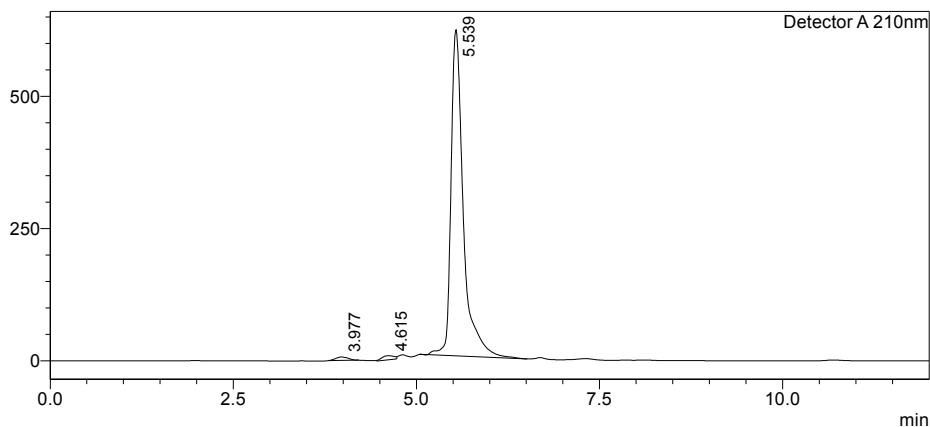

## <Peak Table>

| Peak# | Ret. Time | Area    | Height | Area%   |
|-------|-----------|---------|--------|---------|
| 1     | 3.977     | 76494   | 6656   | 1.035   |
| 2     | 4.615     | 92632   | 7718   | 1.253   |
| 3     | 5.539     | 7223345 | 616035 | 97.712  |
| Total |           | 7392471 | 630409 | 100.000 |

C:\LabSolutions\Data\YM\XQ\XQ-NDFN-tBu-003.lcd



# Analysis Report

## <Sample Information>

**ProPagen 14d**

Sample Name : NDFN-Bn001  
Sample ID : Bn-01  
Data Filename : XQ-NDFN-Bn001.lcd  
Method Filename : method diamidate.lcm  
Batch Filename : Batch01 diamidate 050219.lcb  
Vial # : 1-3  
Injection Volume : 10 uL  
Date Acquired : 05/02/2019 12:50:17  
Date Processed : 05/02/2019 13:02:18  
Sample Type : Unknown  
Acquired by : System Administrator  
Processed by : System Administrator

## <Chromatogram>

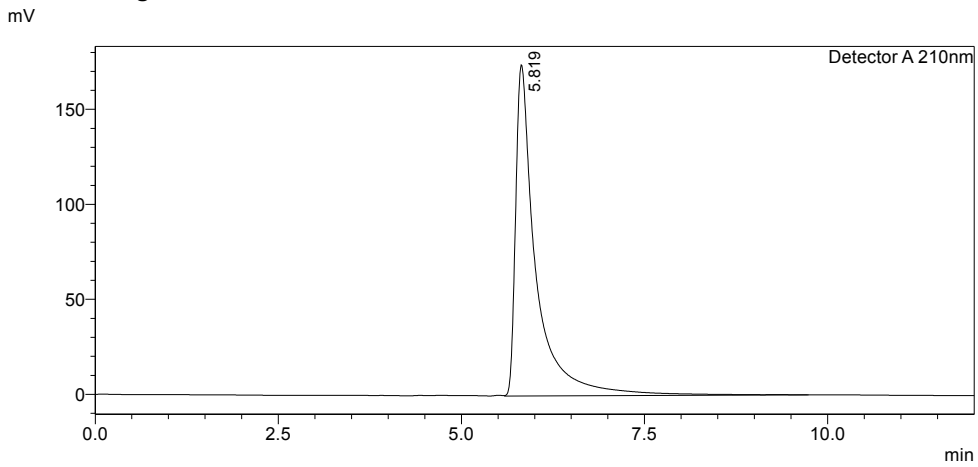

## <Peak Table>

| Detector A 210nm |           |         |        |         |
|------------------|-----------|---------|--------|---------|
| Peak#            | Ret. Time | Area    | Height | Area%   |
| 1                | 5.819     | 3388393 | 174211 | 100.000 |
| Total            |           | 3388393 | 174211 | 100.000 |

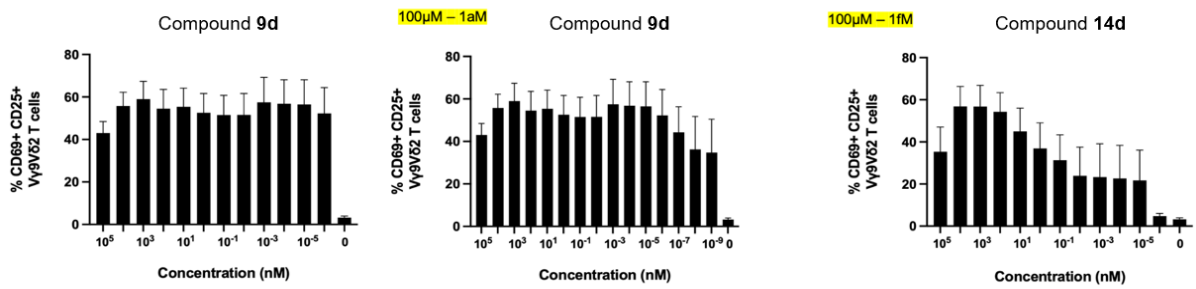

**Figure S2.** Phosphonodiamidate ProPAgen 9d- and 14d-mediated activation of Vγ9/Vδ2 T cells after overnight incubation of PBMC with 9d at 1 attomolar (aM) to 100μM and 14d at 1 femtomolar (fM) to 100μM in order to determine the EC<sub>50</sub> values of these compounds. The level of activation is presented as % CD69+ CD25+ Vγ9/Vδ2 T cells. Data was analyzed with GraphPad Prism v9 software and is shown as mean ± SE (n=4).

**Figure S3. HPLC traces of ProPagens 9d and 14d following dissolution and storage.**

Data File C:\Chem32\3\Data\Jack\Jack-2022\_09\_07\_3 2022-09-07 17-20-43\DHFN BN stock 5uL.D  
 Sample Name: DHFN BN stock 5uL

```

=====
Acq. Operator   : SYSTEM                               Seq. Line :    4
Acq. Instrument : LC-FC                               Location  :    2
Injection Date  : 07-Sep-22 6:39:51 PM                Inj       :    1
                                                    Inj Volume: 15.000 µl
Different Inj Volume from Sample Entry! Actual Inj Volume : 5.000 µl
Method         : C:\Chem32\3\Data\Jack\Jack-2022_09_07_3 2022-09-07 17-20-43\7030 MeOHH2O
              : 12min.M (Sequence Method)
Last changed   : 05-Sep-22 10:33:20 AM by SYSTEM
Sample Info    : DHFN BN stock 5uL
  
```

**ProPagen 9d**

Additional Info : Peak(s) manually integrated

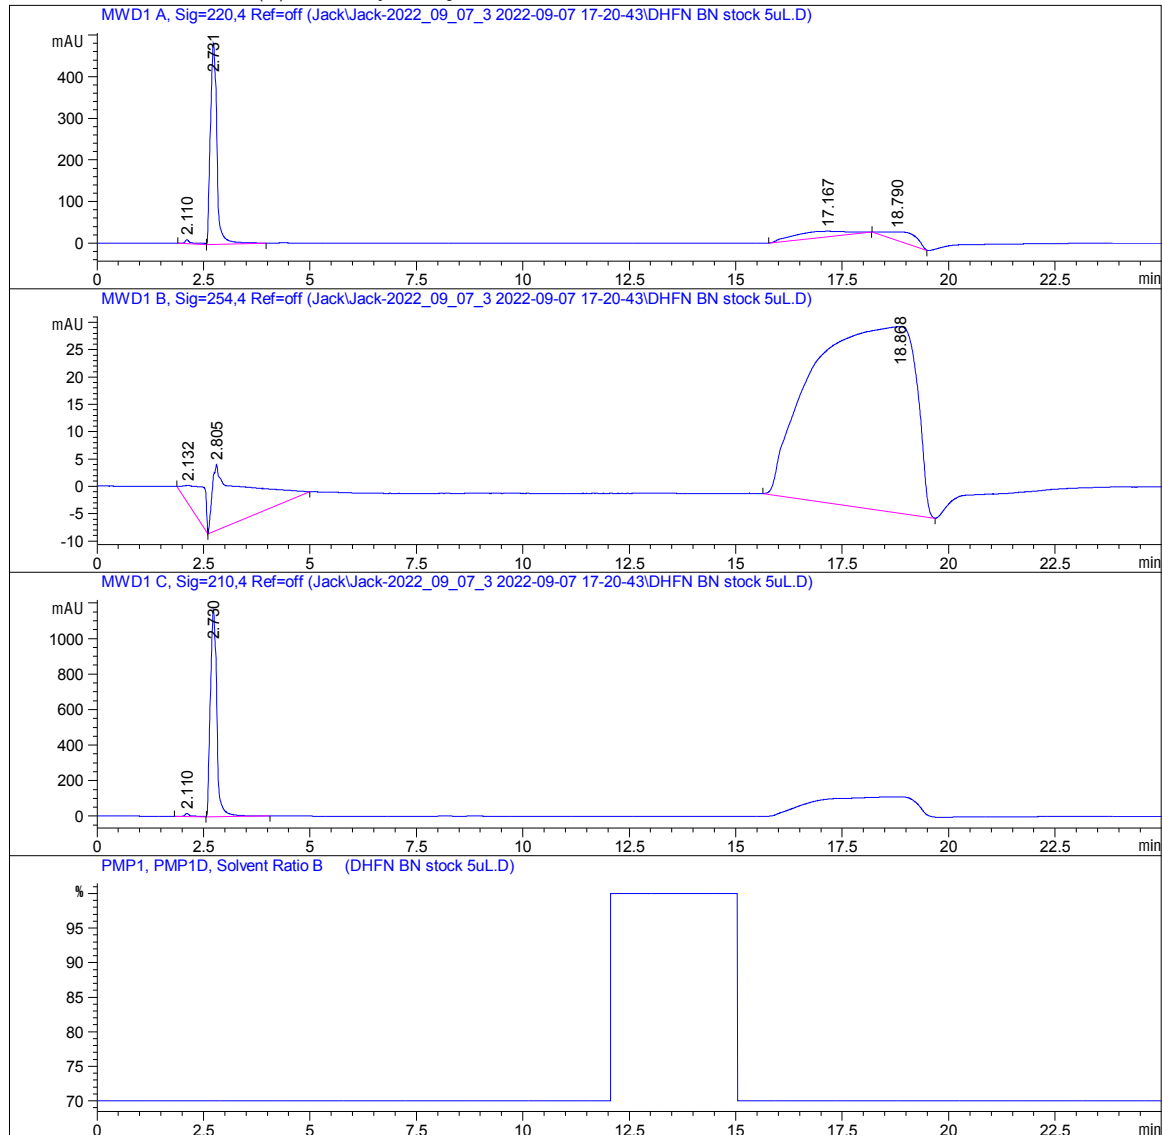

=====  
 Fraction Information  
 =====

=====  
No Fractions found.  
=====

=====  
Area Percent Report  
=====

**ProPagen 9d**

Sorted By : Signal  
Multiplier : 1.0000  
Dilution : 1.0000  
Do not use Multiplier & Dilution Factor with ISTDs

Signal 1: MWD1 A, Sig=220,4 Ref=off

| Peak # | RetTime [min] | Type | Width [min] | Area [mAU*s] | Height [mAU] | Area %  |
|--------|---------------|------|-------------|--------------|--------------|---------|
| 1      | 2.110         | BB   | 0.1661      | 121.78243    | 9.72608      | 1.5731  |
| 2      | 2.731         | BB   | 0.1415      | 5120.33057   | 483.71109    | 66.1404 |
| 3      | 17.167        | BB   | 1.1526      | 1311.39526   | 13.34365     | 16.9396 |
| 4      | 18.790        | BB   | 0.6911      | 1188.10461   | 20.29043     | 15.3470 |

Totals : 7741.61288 527.07125

Signal 2: MWD1 B, Sig=254,4 Ref=off

| Peak # | RetTime [min] | Type | Width [min] | Area [mAU*s] | Height [mAU] | Area %  |
|--------|---------------|------|-------------|--------------|--------------|---------|
| 1      | 2.132         | BB   | 0.6362      | 172.38980    | 3.27453      | 2.6891  |
| 2      | 2.805         | BB   | 0.6326      | 642.50555    | 12.07816     | 10.0225 |
| 3      | 18.868        | BB   | 1.9244      | 5595.75146   | 34.13763     | 87.2884 |

Totals : 6410.64682 49.49033

Signal 3: MWD1 C, Sig=210,4 Ref=off

| Peak # | RetTime [min] | Type | Width [min] | Area [mAU*s] | Height [mAU] | Area %  |
|--------|---------------|------|-------------|--------------|--------------|---------|
| 1      | 2.110         | BB   | 0.1220      | 154.47354    | 17.67632     | 1.2531  |
| 2      | 2.730         | BB   | 0.1421      | 1.21732e4    | 1162.92981   | 98.7469 |

Totals : 1.23277e4 1180.60613

=====  
\*\*\* End of Report \*\*\*

```
=====
Acq. Operator   : SYSTEM                      Seq. Line :    8
Acq. Instrument : LC-FC                      Location  :   13
Injection Date  : 05-Sep-22 1:47:27 PM      Inj       :    1
                                           Inj Volume: 15.000 µl
Different Inj Volume from Sample Entry! Actual Inj Volume : 5.000 µl
Method         : C:\Chem32\3\Data\Jack\Jack-2022_09_05 2022-09-05 10-44-34\7030 Me0HH2O
                                           12min.M (Sequence Method)
Last changed   : 05-Sep-22 10:33:20 AM by SYSTEM
Sample Info    : NDFN BN 1
=====
```

**ProPagen 14d**

Additional Info : Peak(s) manually integrated

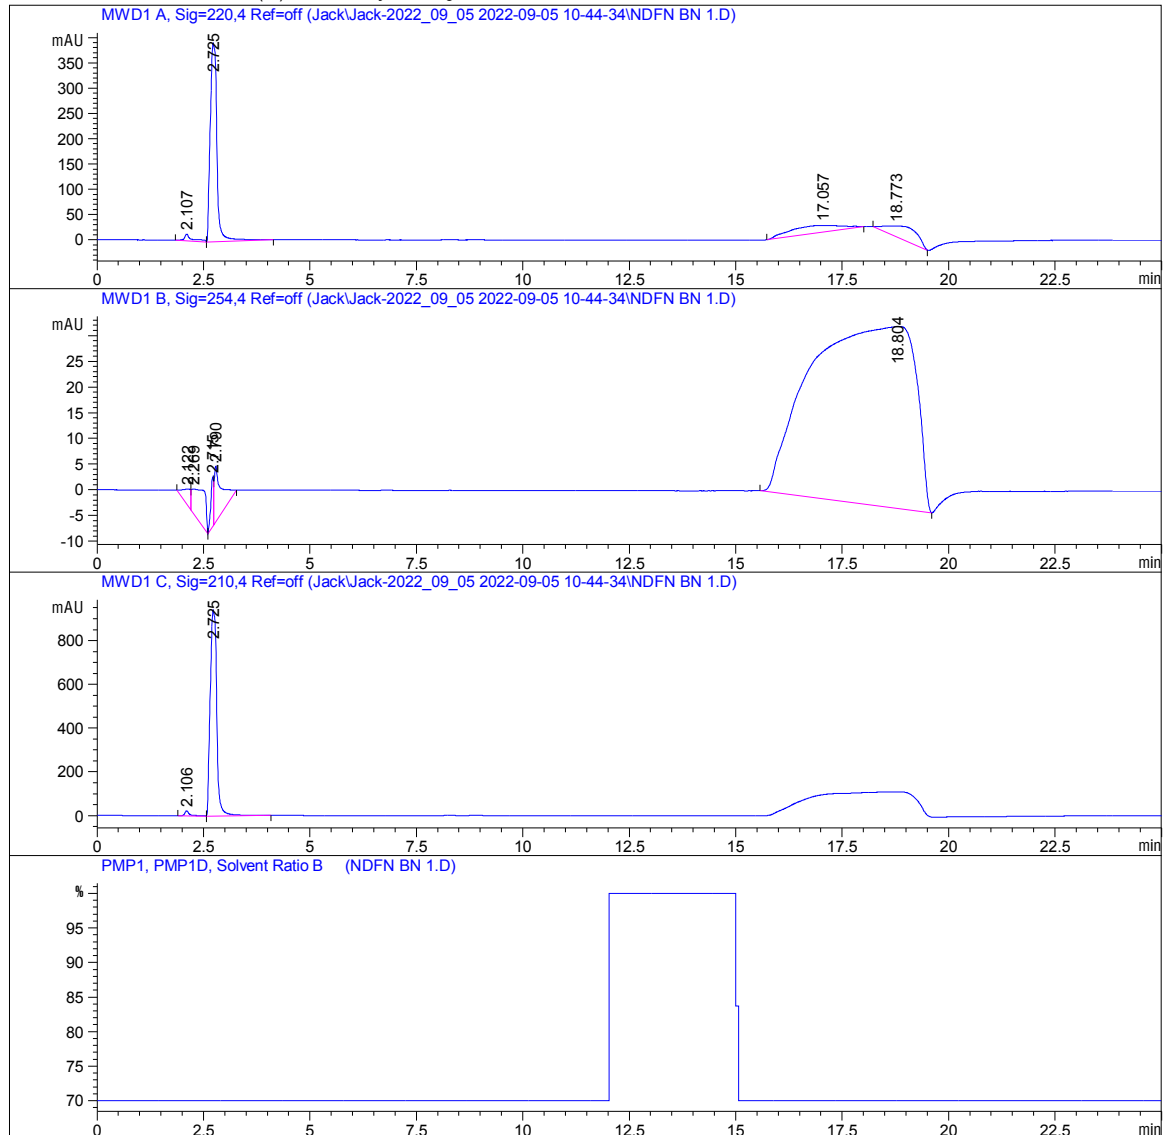

=====  
 Fraction Information

=====  
No Fractions found.  
=====

=====  
Area Percent Report  
=====

**ProPagen 14d**

Sorted By : Signal  
Multiplier : 1.0000  
Dilution : 1.0000  
Do not use Multiplier & Dilution Factor with ISTDs

Signal 1: MWD1 A, Sig=220,4 Ref=off

| Peak # | RetTime [min] | Type | Width [min] | Area [mAU*s] | Height [mAU] | Area %  |
|--------|---------------|------|-------------|--------------|--------------|---------|
| 1      | 2.107         | BB   | 0.1696      | 167.34492    | 13.04740     | 2.4087  |
| 2      | 2.725         | BV R | 0.1439      | 4313.51758   | 393.42148    | 62.0863 |
| 3      | 17.057        | BV R | 1.1181      | 1212.06775   | 12.80741     | 17.4458 |
| 4      | 18.773        | BB   | 0.7254      | 1254.68115   | 20.51801     | 18.0592 |

Totals : 6947.61140 439.79429

Signal 2: MWD1 B, Sig=254,4 Ref=off

| Peak # | RetTime [min] | Type | Width [min] | Area [mAU*s] | Height [mAU] | Area %  |
|--------|---------------|------|-------------|--------------|--------------|---------|
| 1      | 2.122         | BV   | 0.1744      | 40.23585     | 3.08034      | 0.6442  |
| 2      | 2.269         | VB   | 0.3392      | 130.60985    | 4.77356      | 2.0911  |
| 3      | 2.715         | BV   | 0.0656      | 42.26519     | 9.54859      | 0.6767  |
| 4      | 2.790         | VB   | 0.1572      | 132.64157    | 10.80398     | 2.1236  |
| 5      | 18.804        | BB   | 1.9574      | 5900.34521   | 35.38522     | 94.4645 |

Totals : 6246.09768 63.59169

Signal 3: MWD1 C, Sig=210,4 Ref=off

| Peak # | RetTime [min] | Type | Width [min] | Area [mAU*s] | Height [mAU] | Area %  |
|--------|---------------|------|-------------|--------------|--------------|---------|
| 1      | 2.106         | BB   | 0.1224      | 203.74788    | 23.20883     | 1.9814  |
| 2      | 2.725         | BB   | 0.1406      | 1.00791e4    | 943.64679    | 98.0186 |

Totals : 1.02828e4 966.85562

=====  
\*\*\* End of Report \*\*\*

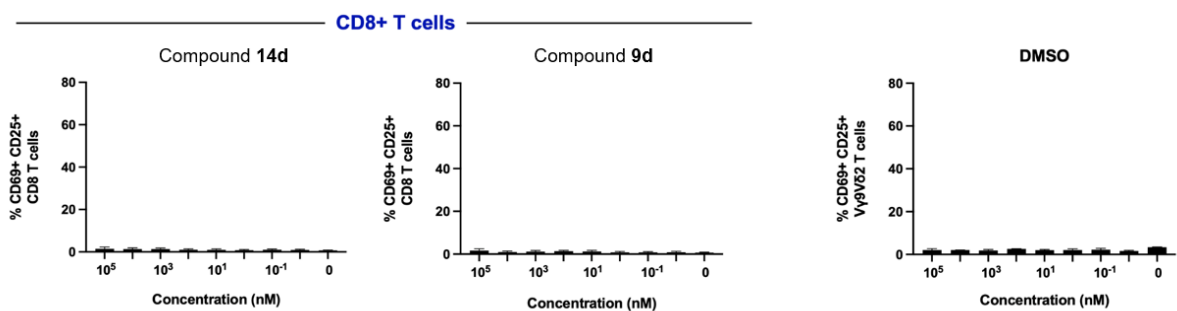

**Figure S4.** Phosphonodiamidate ProPAgen 9d- and 14d-mediated activation of CD8+ T cells (left) in the same overnight cultures as Vγ9/Vδ2 T cells (mean ± SE; n=4). Level of Vγ9/Vδ2 T cell activation with DMSO (right) diluted in the same way as the ProPAgens (mean ± SE; n=4). Data was analyzed with GraphPad Prism v9 software.
